# Supplementary material for: Mechanisms and selectivity of methanol oxidation on PtRuM3/C-MWCNT (M = Fe and Co) electrocatalysts
Source: Royal Society of Chemistry journal article supplement (doi:10.1039/d4ra04493b), 2024-01-01
Supplement: d4ra04493b1.pdf [file d4ra04493b1.pdf]

Electronic Supplementary Information

**Mechanisms and selectivity of methanol oxidation reaction on PtRuM<sub>3</sub>/C-MWCNTs  
(M = Fe, Co) electrocatalysts**

Dang Long Quan,<sup>abc</sup> Viorel Chihaiia,<sup>d</sup> and Do Ngoc Son<sup>\*ab</sup>

<sup>a</sup> Ho Chi Minh City University of Technology (HCMUT), 268 Ly Thuong Kiet Street, District 10, Ho Chi Minh City, Vietnam

<sup>b</sup> Vietnam National University Ho Chi Minh City, Linh Trung Ward, Ho Chi Minh City, Vietnam

<sup>c</sup> Department of Physics, College of Natural Sciences, Can Tho University, Can Tho City, Vietnam

<sup>d</sup> Institute of Physical Chemistry "Ilie Murgulescu" of the Romanian Academy, Splaiul Independentei 202, Sector 6, 060021 Bucharest, Romania

\* Correspondence: [dnson@hcmut.edu.vn](mailto:dnson@hcmut.edu.vn)

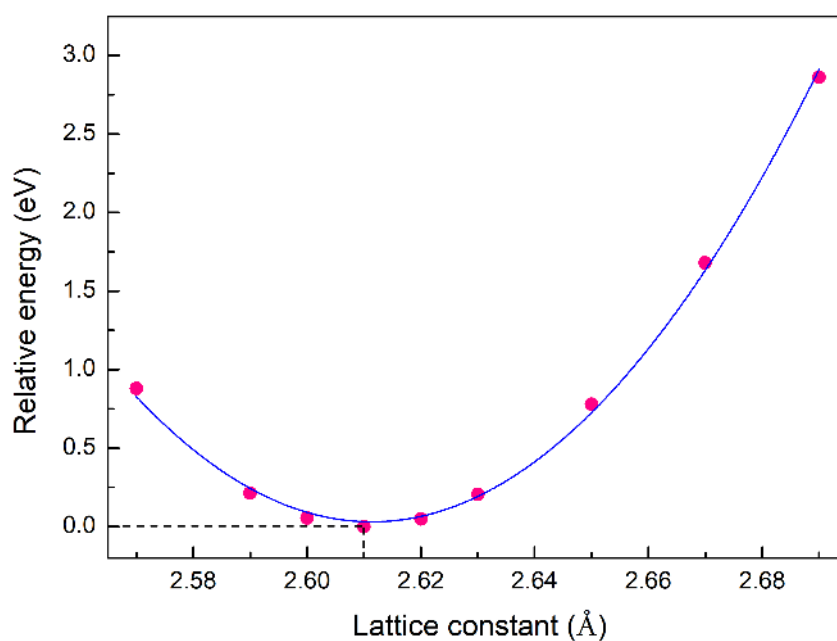

**Fig. S1** The relative energy, compared to that of the minimum point, is a function of the lattice constant of PtRuM<sub>3</sub>/C-MWCNTs (M = Fe, Co) substrates. Both substrates have the same optimized lattice constant of 2.61 Å.

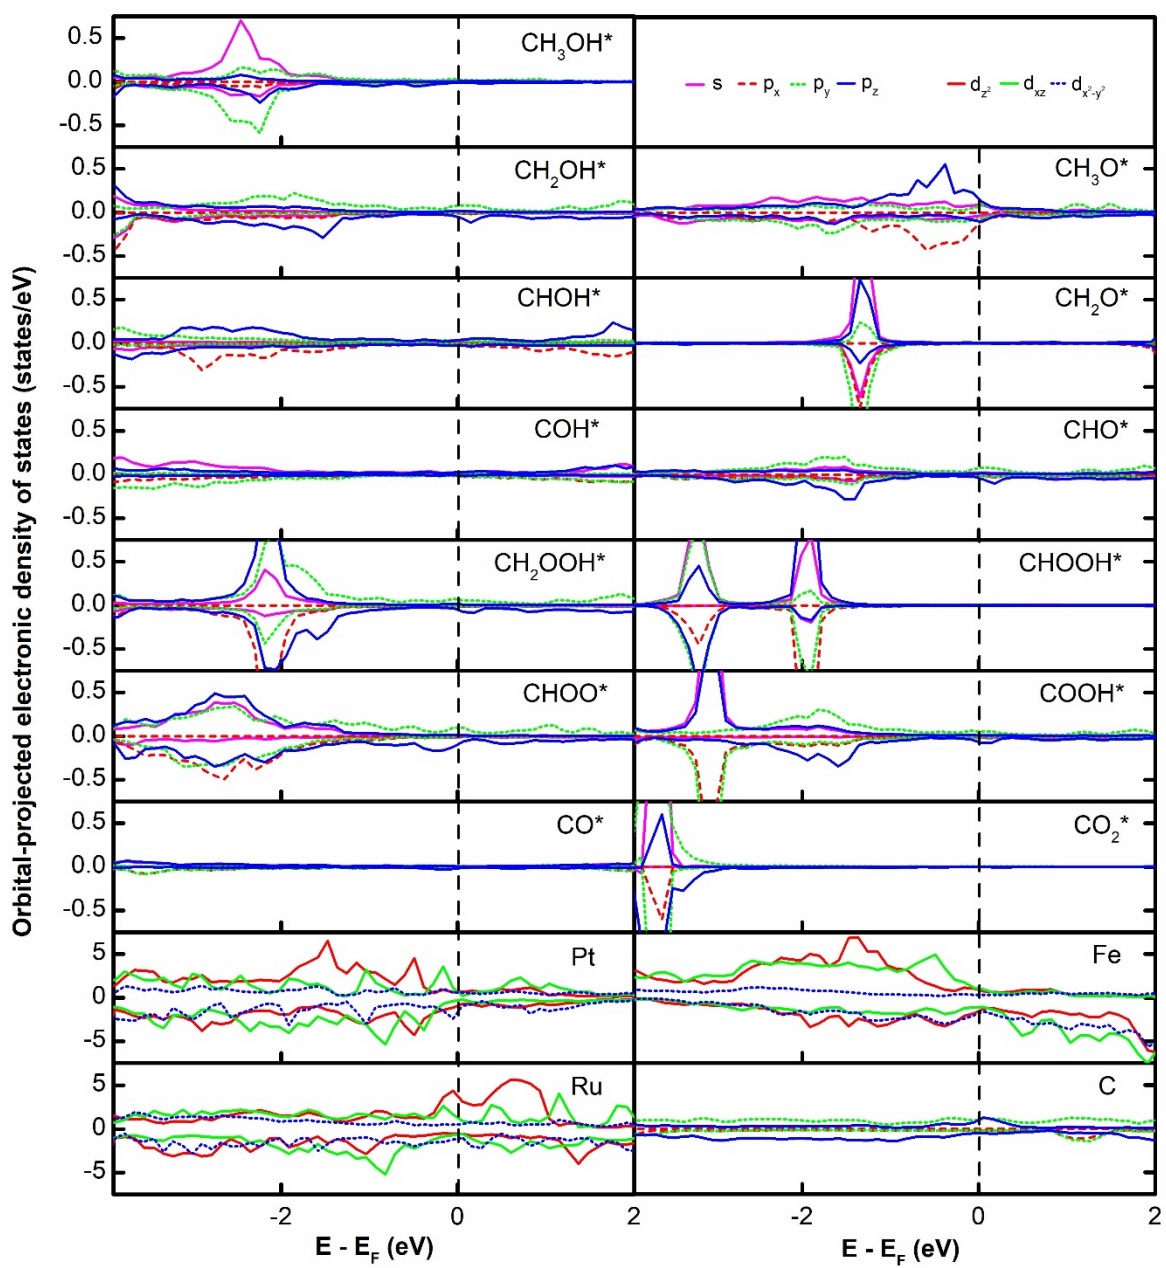

**Fig. S2** The orbital-projected electronic density of states for the systems of the PtRuFe<sub>3</sub>/C-MWCNTs substrate and the adsorbed intermediate:  $d_{xz}$  is identical to  $d_{yz}$ , and  $d_{xy}$  is identical to  $d_{x^2-y^2}$ .

**Table S1** The distances from the nearest atom (carbon atom/oxygen atom) of adsorbate molecules to the surface ( $d_{\text{ads-sur}}$ ), the adsorption energy ( $E_{\text{ads}}$ ), zero-point energy ( $ZPE$ ), and total energy ( $E_{\text{total}}$ , equals  $E_{\text{ads}}$  plus  $ZPE$ ) of the intermediates on the  $\text{Pt}_1\text{Ru}_1\text{M}_3$  ( $M = \text{Fe}, \text{Co}$ ) substrates. The adsorption sites: T = the top of a Pt atom, B = the bridge of two Pt atoms, and H = the hollow with an underneath Ru atom.

| Molecule          | Radical                   | $d_{\text{ads-sur}}$ (Å) |               | $E_{\text{ads}}$ (eV) |        | $ZPE$ (eV) |        | $E_{\text{total}}$ (eV) |        |
|-------------------|---------------------------|--------------------------|---------------|-----------------------|--------|------------|--------|-------------------------|--------|
|                   |                           | M = Fe (site)            | M = Co (site) | M = Fe                | M = Co | M = Fe     | M = Co | M = Fe                  | M = Co |
| Methanol          | $\text{CH}_3\text{OH}^*$  | 2.76 (T)                 | 2.66 (T)      | -0.078                | -0.097 | 1.375      | 1.379  | 1.297                   | 1.282  |
| Methoxy           | $\text{CH}_3\text{O}^*$   | 2.18 (T)                 | 2.11 (T)      | -1.184                | -1.243 | 1.061      | 1.060  | -0.123                  | -0.183 |
| Formaldehyde      | $\text{CH}_2\text{O}^*$   | 2.96 (T)                 | 3.06 (T)      | -0.032                | -0.029 | 0.721      | 0.724  | 0.689                   | 0.695  |
| Formyl            | $\text{CHO}^*$            | 2.35 (T)                 | 2.31 (T)      | -1.943                | -1.912 | 0.470      | 0.471  | -1.473                  | -1.441 |
| Carbon monoxide   | $\text{CO}^*$             | 2.22 (T)                 | 2.16 (T)      | -1.066                | -1.068 | 0.203      | 0.205  | -0.863                  | -0.863 |
| Hydroxymethyl     | $\text{CH}_2\text{OH}^*$  | 2.50 (T)                 | 2.51 (T)      | -1.596                | -1.576 | 1.109      | 1.106  | -0.487                  | -0.470 |
| Hydroxymethylene  | $\text{CHOH}^*$           | 1.94 (B)                 | 1.88 (B)      | -3.419                | -3.543 | 0.800      | 0.801  | -2.619                  | -2.742 |
| Isoformyl         | $\text{COH}^*$            | 1.50 (H)                 | 1.44 (H)      | -3.593                | -3.462 | 0.492      | 0.492  | -3.101                  | -2.970 |
| Hydroperoxymethyl | $\text{CH}_2\text{OOH}^*$ | 2.48 (T)                 | 2.46 (T)      | -1.637                | -1.387 | 1.162      | 1.171  | -0.475                  | -0.216 |
| Formic acid       | $\text{CHOOH}^*$          | 2.95 (T)                 | 3.07 (T)      | -0.023                | -0.034 | 0.902      | 0.901  | 0.879                   | 0.867  |
| Carboxyl          | $\text{COOH}^*$           | 2.39 (T)                 | 2.38 (T)      | -1.900                | -1.920 | 0.616      | 0.616  | -1.284                  | -1.304 |
| Formate           | $\text{CHOO}^*$           | 2.32 (T-T)               | 2.29 (T-T)    | -1.933                | -2.072 | 0.611      | 0.615  | -1.322                  | -1.457 |
| Carbon dioxide    | $\text{CO}_2^*$           | 3.32 (T-B)               | 3.43 (T-B)    | 0.032                 | 0.010  | 0.316      | 0.316  | 0.348                   | 0.326  |

**Table S2** The thermodynamic barrier (eV) of the intermediate steps on the  $\text{PtRuM}_3$  ( $M = \text{Fe}, \text{Co}$ ) substrates at the applied potential  $U = 0$  V, the pressure of 1 bar, and the temperature of 300 K. The thermodynamic barrier of the rate-limiting step is marked by bold font. The pathway corresponding to the highest thermodynamic barrier is presented in parentheses.

| Intermediate step                                                                                                                 | $\text{PtRuFe}_3$    | $\text{PtRuCo}_3$    |
|-----------------------------------------------------------------------------------------------------------------------------------|----------------------|----------------------|
| $\text{CH}_3\text{OH} + \text{H}_2\text{O} \rightarrow \text{CH}_3\text{OH}^* + \text{H}_2\text{O}$                               | <b>0.417 (Path1)</b> | 0.376                |
| $\text{CH}_3\text{OH}^* + \text{H}_2\text{O} \rightarrow \text{CH}_3\text{O}^* + 1/2\text{H}_2 + \text{H}_2\text{O}$              | <b>0.950 (Path3)</b> | <b>0.901 (Path3)</b> |
| $\text{CH}_3\text{OH}^* + \text{H}_2\text{O} \rightarrow \text{CH}_2\text{OH}^* + 1/2\text{H}_2 + \text{H}_2\text{O}$             | 0.176                | 0.230                |
| $\text{CH}_3\text{O}^* + 1/2\text{H}_2 + \text{H}_2\text{O} \rightarrow \text{CH}_2\text{O}^* + \text{H}_2 + \text{H}_2\text{O}$  | -0.388               | -0.283               |
| $\text{CH}_2\text{OH}^* + 1/2\text{H}_2 + \text{H}_2\text{O} \rightarrow \text{CH}_2\text{O}^* + \text{H}_2 + \text{H}_2\text{O}$ | 0.386                | <b>0.388 (Path1)</b> |
| $\text{CH}_2\text{OH}^* + 1/2\text{H}_2 + \text{H}_2\text{O} \rightarrow \text{CHOH}^* + \text{H}_2 + \text{H}_2\text{O}$         | 0.401                | 0.277                |
| $\text{CH}_2\text{O}^* + \text{H}_2 + \text{H}_2\text{O} \rightarrow \text{CH}_2\text{OOH}^* + 3/2\text{H}_2$                     | <b>2.737 (Path4)</b> | <b>2.958 (Path4)</b> |
| $\text{CH}_2\text{O}^* + \text{H}_2 + \text{H}_2\text{O} \rightarrow \text{CHO}^* + 3/2\text{H}_2 + \text{H}_2\text{O}$           | -0.465               | -0.378               |
| $\text{CHOH}^* + \text{H}_2 + \text{H}_2\text{O} \rightarrow \text{CHO}^* + 3/2\text{H}_2 + \text{H}_2\text{O}$                   | -0.480               | -0.267               |
| $\text{CHOH}^* + \text{H}_2 + \text{H}_2\text{O} \rightarrow \text{COH}^* + 3/2\text{H}_2 + \text{H}_2\text{O}$                   | -0.191               | 0.056                |
| $\text{CH}_2\text{OOH}^* + 3/2\text{H}_2 \rightarrow \text{CHOOH}^* + 2\text{H}_2$                                                | -2.942               | -3.192               |
| $\text{CHO}^* + 3/2\text{H}_2 + \text{H}_2\text{O} \rightarrow \text{CHOOH}^* + 2\text{H}_2$                                      | 0.260                | 0.144                |
| $\text{CHO}^* + 3/2\text{H}_2 + \text{H}_2\text{O} \rightarrow \text{CO}^* + 2\text{H}_2 + \text{H}_2\text{O}$                    | -0.511               | -0.609               |
| $\text{COH}^* + 3/2\text{H}_2 + \text{H}_2\text{O} \rightarrow \text{CO}^* + 2\text{H}_2 + \text{H}_2\text{O}$                    | -0.800               | -0.932               |
| $\text{CHOOH}^* + 2\text{H}_2 \rightarrow \text{CHOO}^* + 5/2\text{H}_2$                                                          | 0.229                | 0.112                |
| $\text{CHOOH}^* + 2\text{H}_2 \rightarrow \text{COOH}^* + 5/2\text{H}_2$                                                          | -0.010               | -0.087               |
| $\text{CO}^* + 2\text{H}_2 + \text{H}_2\text{O} \rightarrow \text{COOH}^* + 5/2\text{H}_2$                                        | <b>0.761 (Path2)</b> | <b>0.666 (Path2)</b> |
| $\text{CHOO}^* + 5/2\text{H}_2 \rightarrow \text{CO}_2^* + 3\text{H}_2$                                                           | -0.667               | -0.623               |
| $\text{COOH}^* + 5/2\text{H}_2 \rightarrow \text{CO}_2^* + 3\text{H}_2$                                                           | -0.428               | -0.424               |
